# Supplementary material for: MicroRNA expression analysis in the liver of high fat diet-induced obese mice
Source: PubMed Central journal article supplement (PMC5153443; doi:10.1016/j.dib.2016.11.081), 2016-12-01
Supplement: mmc1.pdf [file mmc1.pdf]

To view the full contents of this document, you need a later version of the PDF viewer. You can upgrade to the latest version of Adobe Reader from [www.adobe.com/products/acrobat/readstep2.html](http://www.adobe.com/products/acrobat/readstep2.html)

For further support, go to [www.adobe.com/support/products/acrreader.html](http://www.adobe.com/support/products/acrreader.html)
